# Supplementary material for: Oxygen doping in nickel oxide for highly efficient planar perovskite solar cells
Source: Royal Society of Chemistry journal article supplement (doi:10.1039/c8ta00161h), 2018-01-01
Supplement: c8ta00161h1.pdf [file c8ta00161h1.pdf]

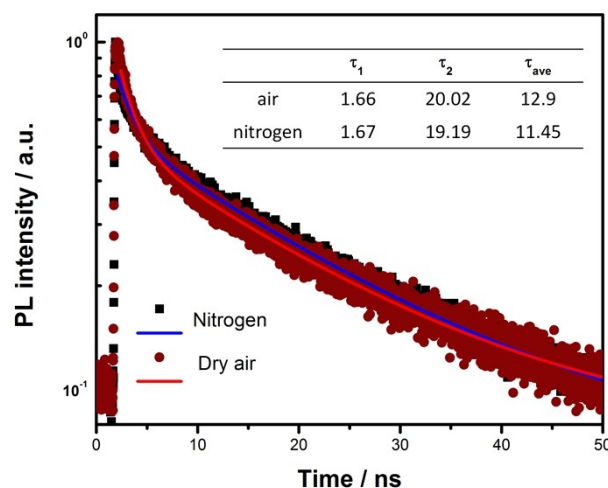

Figure S1. Transient photoluminescence of perovskite on glass prepared under different atmospheres.

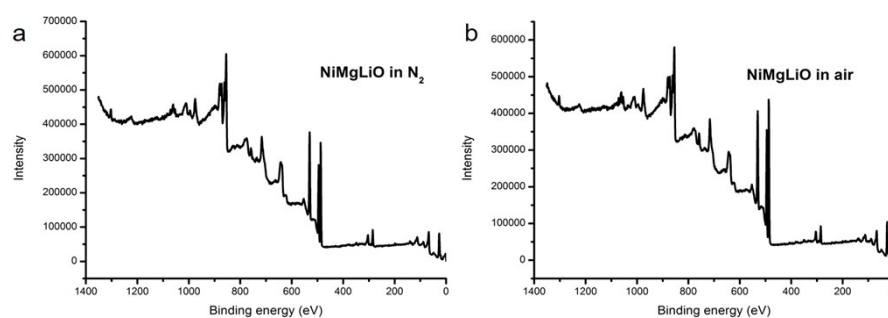

Figure S2. Survey spectra of NiMgLiO films annealed under different atmospheres.

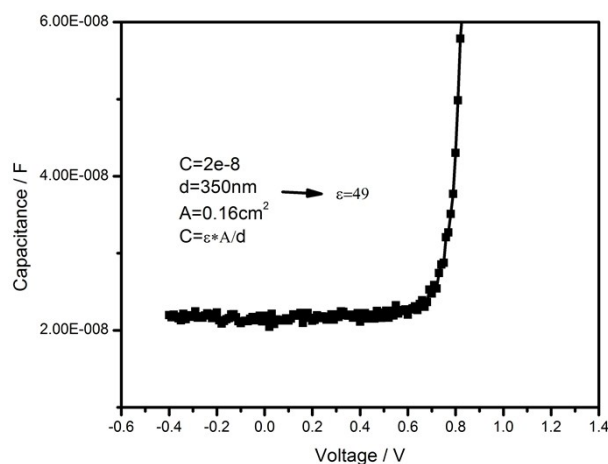

Figure S3. Dielectric constant derived from C-V measurement.

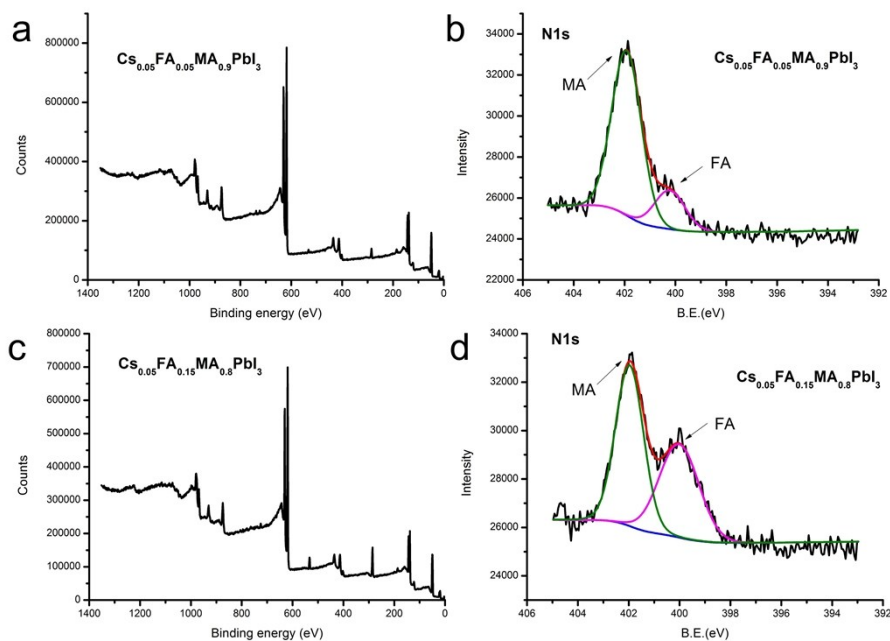

Figure S4. XPS spectra of  $\text{Cs}_{0.05}\text{FA}_x\text{MA}_{0.95-x}\text{PbI}_3$ . (a) Survey spectra of  $\text{Cs}_{0.05}\text{FA}_{0.05}\text{MA}_{0.9}\text{PbI}_3$  film. (b) N1s spectra of  $\text{Cs}_{0.05}\text{FA}_{0.05}\text{MA}_{0.9}\text{PbI}_3$ . (c) Survey spectra of  $\text{Cs}_{0.05}\text{FA}_{0.15}\text{MA}_{0.8}\text{PbI}_3$  film. (d) N1s spectra of  $\text{Cs}_{0.05}\text{FA}_{0.15}\text{MA}_{0.8}\text{PbI}_3$ .

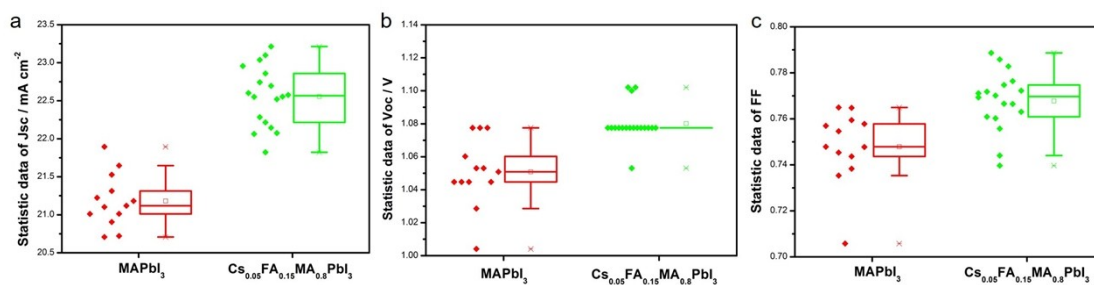

Figure S5. Statistic values of the fabricated perovskite solar cells. (a)  $J_{sc}$ , (b)  $V_{oc}$ , (c) FF.
